# Supplementary material for: Balance Recovery Prediction with Multiple Strategies for Standing Humans
Source: PubMed Central journal article supplement (PMC4790971; doi:10.1371/journal.pone.0151166), 2016-03-14
Supplement: pone.0151166.s001.pdf [file pone.0151166.s001.pdf]

## 434 **Appendix S1: Relation between variables of the cost function**

435 Variables represented with capital letters stand for column vectors of values over the prediction horizon,  
436 e.g.

$$C_{k+1} = \begin{bmatrix} c_{k+1} \\ \vdots \\ c_{k+N} \end{bmatrix} \quad (\text{S1.1})$$

437

### 438 **Time derivatives**

The position, speed and acceleration of the CoM over the whole prediction horizon can be related to the CoM state of the system at a time  $t_k$ ,  $\hat{c}_k = [c_k \quad \dot{c}_k \quad \ddot{c}_k]^T$ , and the piecewise constant third derivative  $\ddot{\ddot{C}}_k = [\ddot{\ddot{c}}_k, \dots, \ddot{\ddot{c}}_{k+N-1}]^T$  through constant matrices:

$$C_{k+1} = S_p \hat{c}_k + U_p \ddot{\ddot{C}}_k, \quad (\text{S1.2})$$

$$\dot{C}_{k+1} = S_v \hat{c}_k + U_v \ddot{\ddot{C}}_k, \quad (\text{S1.3})$$

$$\ddot{C}_{k+1} = S_a \hat{c}_k + U_a \ddot{\ddot{C}}_k. \quad (\text{S1.4})$$

439 Details of these matrices can be found in [30]. Identical relationships can be derived for the motion of the  
440 flywheel segment.

### 441 **Center of Pressure**

442 The linear dynamics (1) can be reversed to compute the position of the CoP as:

$$z_x = c_x - \frac{h}{g} \ddot{c}_x - \frac{j}{mg} \ddot{\theta} \quad (\text{S1.5})$$

443 The position of the CoP over the whole prediction horizon  $Z_{k+1}$  can then be related to the piece-wise  
444 constant third derivatives  $\ddot{\ddot{C}}_k$  and  $\ddot{\ddot{\Theta}}_k$ :

$$Z_{k+1} = S_z \begin{bmatrix} \hat{c}_k \\ \hat{\theta}_k \end{bmatrix} + U_z \begin{bmatrix} \ddot{\ddot{C}}_k \\ \ddot{\ddot{\Theta}}_k \end{bmatrix}, \quad (\text{S1.6})$$

with

$$S_z = \begin{bmatrix} S_p - \frac{h}{g} S_a & -\frac{j}{mg} S_a \end{bmatrix}, \quad (\text{S1.7})$$

$$U_z = \begin{bmatrix} U_p - \frac{h}{g} U_a & -\frac{j}{mg} U_a \end{bmatrix}. \quad (\text{S1.8})$$

### 445 **Foot position**

446 The position of the support foot over the whole prediction horizon  $F_{k+1}$  can be related to the current  
447 support foot position  $f_k$ , which is fixed on the ground, and the positions  $\bar{F}_{k+1}$  of the future steps, which  
448 is an optimization variable. If the step durations are already known, this can be done easily with matrices  
449  $V_{k+1}$  and  $\bar{V}_{k+1}$  filled with 0s and 1s simply indicating which sampling times  $t_i$  fall within which steps:

$$F_{k+1} = V_{k+1} f_k + \bar{V}_{k+1} \bar{F}_{k+1} \quad (\text{S1.9})$$

450

451 Swing foot acceleration

452 The motion of the swing foot is interpolated in the forward/backward direction with 5th degree polynomials  
453 between its current position, velocity and acceleration and the future positions of the foot on the ground,  
454 with zero velocity and acceleration (no impact). This trajectory is further discretized. Acceleration of the  
455 swing foot  $\ddot{f}'_j$  at each of these discretization instants  $t_j$  can then be related to the step landing position  
456 via a linear relation:

$$\ddot{f}'_j = a_j \bar{F}_{k+1} + b_j \quad (\text{S1.10})$$

457 where  $a_j$  and  $b_j$  only depend on the discretization instant  $t_j$  and the current state of the swing foot. This  
458 relation can be extended over the whole prediction horizon:

$$\ddot{F}'_{k+1} = A \bar{F}_{k+1} + B \quad (\text{S1.11})$$

459 where  $A$  is a matrix whose rows correspond to discretization times  $t_j$  and columns to steps, and  $B$  is a  
460 column vectors.

461 Note that the foot is assumed to be sufficiently removed from the ground during its motion and its effects  
462 on the system dynamics are neglected (LIP assumption).
