# Supplementary material for: Balance Recovery Prediction with Multiple Strategies for Standing Humans
Source: PubMed Central journal article supplement (PMC4790971; doi:10.1371/journal.pone.0151166), 2016-03-14
Supplement: pone.0151166.s002.pdf [file pone.0151166.s002.pdf]

## 463 Appendix S2: Kinematics and dynamics constraints

464 The balance recovery is subjected to a series of kinematic and dynamic constraints that have to be satisfied  
 465 over the whole prediction horizon, for all  $i \in [k + 1, \dots, k + N]$ . These include:

- 466 1. Direct linear bounds on the flywheel rotation in terms of its angle and torque

$$\|\theta_i\| \leq \theta_{max} \quad (\text{S2.1})$$

467 and

$$\|j\ddot{\theta}_i\| \leq \tau_{max} \quad (\text{S2.2})$$

468 where the rotation angle  $\theta_i$  and the acceleration  $\ddot{\theta}_i$  at each instant are related to the optimization  
 469 variable  $\ddot{\Theta}_k$  through recursive relations of the form (S1.2) and (S1.4).

- 470 2. Upper bound for the extension of the support leg, enforced by limiting the distance between the  
 471 horizontal position of the CoM and the horizontal position of the support foot on the ground:

$$\|c_i - f_i\| \leq l_{max} \quad (\text{S2.3})$$

472 with  $c_i$  and  $f_i$  related to the optimization variables  $\ddot{C}_k$  and  $\bar{F}_{k+1}$  through equations (S1.4) and  
 473 (S1.9) respectively.

- 474 3. Upper bound for the acceleration of the swing foot:

$$\|\ddot{f}'_i\| \leq \ddot{f}'_{max} \quad (\text{S2.4})$$

475 where  $\ddot{f}'_i$  can be related to the optimization variable through equation (S1.11). This constraint  
 476 limits the step length for a given step duration.

- 477 4. Constraints on the CoP, which has to stay within the boundaries of the foot:

$$D(z_i - f_i) \leq b, \quad (\text{S2.5})$$

478 where  $D$  and  $b$  are a matrix and a vector encoding the shape of the foot with respect to the position  
 479  $f_i$  of the support foot on the ground. In our 2D case, with instants  $t_i$  falling always during single  
 480 support phases, the relation  $D$  is reduced to two simple linear bounds:

$$\begin{cases} (z_i - f_i) \leq l_{Ffront} \\ -(z_i - f_i) \leq l_{Fback} \end{cases} \quad (\text{S2.6})$$

481 Again  $z_i$  and  $f_i$  can be related to the optimization variable through equations (S1.6) and (S1.9)  
 482 respectively.

483 All these constraints can be expressed as a set of linear inequality constraints on the optimization  
 484 variables.
